# Supplementary material
Source: PubMed Central journal article supplement (PMC4007212)
Supplement: NIHMS572356-supplement-supplement_1.pdf [file NIHMS572356-supplement-supplement_1.pdf]

## Appendix Supplementary material

**Supplementary Table I.** Association of Gal-3 and AF after adjustment for medication use

| Model                                                    | HR<br>(95% CI)      | P   |
|----------------------------------------------------------|---------------------|-----|
| Multivariable-adjusted*                                  | 1.12<br>(0.98-1.28) | .10 |
| Multivariable* + lipid-lowering medication use           | 1.12<br>(0.98-1.28) | .09 |
| Multivariable* + aspirin use                             | 1.12<br>(0.98-1.28) | .11 |
| Multivariable* + prevalent stroke, TIA, vascular disease | 1.11<br>(0.97-1.27) | .11 |

Abbreviation: TIA, Transient ischemic attack.

\*Multivariable model adjusted for age, sex, height, weight, systolic and diastolic blood pressures, diabetes mellitus, smoking status, history of HF, and history of myocardial infarction.

**Supplementary Table II.** Association of Gal-3 and AF by eGFR strata

| eGFR stratum                        | n    | HR (95% CI)      | P   |
|-------------------------------------|------|------------------|-----|
| ≥90 mL/min per 1.73m <sup>2</sup>   | 1298 | 1.07 (0.83-1.37) | .61 |
| 60-89 mL/min per 1.73m <sup>2</sup> | 1718 | 1.13 (0.93-1.38) | .22 |
| <60 mL/min per 1.73m <sup>2</sup>   | 290  | 1.33 (0.95-1.85) | .09 |

**Supplementary Table III.** Performance metrics of Gal-3 in AF risk prediction

|                                                    | Incident AF         |
|----------------------------------------------------|---------------------|
| c statistic (95% CI)*                              |                     |
| Clinical model†                                    | 0.781 (0.754-0.809) |
| Clinical model + Gal-3                             | 0.782 (0.755-0.809) |
| P value (clinical model vs clinical model + Gal-3) | 0.86                |
| IDI (95% CI)                                       | 0.002 (0.001-0.004) |
| Category-free NRI (95% CI)                         | 3% (-10% to 16%)    |
| Clinical model vs clinical model + Gal-3           |                     |
| Categorical NRI (95% CI)                           | -1% (-4% to 2%)     |
| Clinical model vs clinical model + Gal-3           |                     |

\*The c statistics for the addition of BNP and CRP to the clinical model have previously been published<sup>40</sup> and are as follows: clinical model 0.78 (95% CI 0.75-0.81), clinical model + BNP 0.80 (95% CI 0.78-0.83), clinical model + CRP 0.78 (0.75-0.81).

†The clinical model includes age, sex, height, weight, systolic and diastolic blood pressures, diabetes mellitus, smoking status, history of HF, and history of myocardial infarction.

## Supplementary Reference

- Schnabel RB, Larson MG, Yamamoto JF, et al. Relations of biomarkers of distinct pathophysiological pathways and atrial fibrillation incidence in the community. *Circulation* 2010;121:200-7.
